# Supplementary material
Source: publisher figshare collection journal article supplement (https://rs.figshare.com/ndownloader/files/9441148)
Supplement: Supplementary file 1 [file 9441148]

## Sheet: Sheet1
Kageyama D, Yoshimura K, Sugimoto TN, Katoh TK and Watada M (2017) "Maternally transmitted non-bacterial male killer in Drosophila biauraria" Biology Letters
Electronic supplementary material, S1
Variable sites in a 658-bp sequence of mitochondrial COI region
Matrilines	Sex-ratio trait	Variable sites
		10	235	266	496	508	577	616
SP12F	all-female	C	C	C	G	G	G	T
SP11-20	1:1	T	T	T	A	A	A	C
SP11-20, Injected-1	all-female	T	T	T	A	A	A	C
SP11-20, Injected-2	all-female	T	T	T	A	A	A	C
SP11-20, Injected-3	all-female	T	T	T	A	A	A	C
SP11-20, Injected-4	all-female	T	T	T	A	A	A	C
